# Supplementary material for: Measurement of 1H NMR relaxation times in complex organic chemical systems: application of PSYCHE
Source: Royal Society of Chemistry journal article supplement (doi:10.1039/c6ra20047h), 2016-01-01
Supplement: c6ra20047h1.pdf [file c6ra20047h1.pdf]

# Supporting Information

## Measurement of $^1\text{H}$ NMR Relaxation Times in Complex Organic Chemical Systems: Application of PSYCHE

Veera Mohana Rao Kakita,<sup>a</sup> Vaibhav Kumar Shukla,<sup>a</sup> Mandar Bopardikar,<sup>b</sup> Tannistha Bhattacharya,<sup>c</sup> and Ramakrishna V. Hosur<sup>a,b\*</sup>

- 
- a UM-DAE Centre for Excellence in Basic Sciences,  
University of Mumbai, Kalina Campus, Santacruz,  
Mumbai 400 098, India  
E-mail: hosur@tifr.res.in
- b Department of Chemical Sciences,  
Tata Institute of Fundamental Research (TIFR),  
1-Homi Bhabha Road, Colaba,  
Mumbai 400 005, India
- c Department of Chemistry  
National Institute of Technology, Jamshedpur 831014, India

### Experimental details of Inrec and Inrec-PSYCHE recorded for estradiol

Spectral width: 7000 Hz (F2) and 50 Hz (F1)

Number of data points (F2): 8192

Number of decoupling chunks (F1): 32

Recycle delay: 10 s

Number of scans/ Dummy scans: 4/ 4

| Inrec                   |                    | PSYCHE-Inrec            |                        |
|-------------------------|--------------------|-------------------------|------------------------|
| Delay $\tau$            | Experimental time  | Delay $\tau$            | Experimental time      |
| 0.0 s                   | 1 min 24 s         | 0.0 s                   | 24 min 6 s             |
| 0.2 s                   | 1 min 26 s         | 0.2 s                   | 24 min 33 s            |
| 0.4 s                   | 1 min 28 s         | 0.4 s                   | 24 min 59 s            |
| 0.6 s                   | 1 min 29 s         | 0.6 s                   | 25 min 26 s            |
| 0.8 s                   | 1 min 31 s         | 0.8 s                   | 25 min 52 s            |
| 1.0 s                   | 1 min 32 s         | 1.0 s                   | 26 min 18 s            |
| 1.2 s                   | 1 min 34 s         | 1.2 s                   | 26 min 45 s            |
| 1.4 s                   | 1 min 36 s         | 1.4 s                   | 27 min 11 s            |
| 1.6 s                   | 1 min 37 s         | 1.6 s                   | 27 min 38 s            |
| 1.8 s                   | 1 min 39 s         | 1.8 s                   | 28 min 4 s             |
| 2.0 s                   | 1 min 40 s         | 2.0 s                   | 28 min 30 s            |
| 2.2 s                   | 1 min 42 s         | 2.2 s                   | 28 min 57 s            |
| 2.4 s                   | 1 min 44 s         | 2.4 s                   | 29 min 23 s            |
| Total experimental time | <b>20 min 22 s</b> | Total experimental time | <b>5 h 47 min 42 s</b> |

### Experimental details of CPMG and CPMG-PSYCHE recorded for estradiol

Spectral width: 7000 Hz (F2) and 50 Hz (F1)

Number of data points (F2): 8192

Number of decoupling chunks (F1): 32

Recycle delay: 10 s

Number of scans/ Dummy scans: 4/ 4

$\tau_e$  : 1 ms

| CPMG                    |                           |                    | CPMG-PSYCHE             |                           |                        |
|-------------------------|---------------------------|--------------------|-------------------------|---------------------------|------------------------|
| Number of loops (m)     | Delay $\tau = 2\tau_{em}$ | Experimental time  | Number of loops (m)     | Delay $\tau = 2\tau_{em}$ | Experimental time      |
| 100                     | 0.2 s                     | 1 min 26 s         | 100                     | 0.2 s                     | 24 min 33 s            |
| 200                     | 0.4 s                     | 1 min 28 s         | 200                     | 0.4 s                     | 25 min 0 s             |
| 300                     | 0.6 s                     | 1 min 29 s         | 300                     | 0.6 s                     | 25 min 26 s            |
| 400                     | 0.8 s                     | 1 min 31 s         | 400                     | 0.8 s                     | 25 min 53 s            |
| 500                     | 1.0 s                     | 1 min 33 s         | 500                     | 1.0 s                     | 26 min 20 s            |
| 600                     | 1.2 s                     | 1 min 34 s         | 600                     | 1.2 s                     | 26 min 46 s            |
| 700                     | 1.4 s                     | 1 min 36 s         | 700                     | 1.4 s                     | 27 min 13 s            |
| 800                     | 1.6 s                     | 1 min 37 s         | 800                     | 1.6 s                     | 27 min 39 s            |
| 900                     | 1.8 s                     | 1 min 39 s;        | 900                     | 1.8 s                     | 28 min 6 s             |
| 1000                    | 2.0 s                     | 1 min 41 s         | 1000                    | 2.0 s                     | 28 min 33 s            |
| 1200                    | 2.4 s                     | 1 min 44 s         | 1200                    | 2.4 s                     | 29 min 26 s            |
| Total experimental time |                           | <b>16 min 18 s</b> | Total experimental time |                           | <b>4 h 54 min 55 s</b> |

### Experimental details of Inrec-PSYCHE/ CPMG-PSYCHE recorded for Naringin/ Naringin+HSA

Spectral width: 7000 Hz (F2) and 50 Hz (F1)

Number of data points (F2): 8192

Number of decoupling chunks (F1): 32

Recycle delay: 10 s

Number of scans/ Dummy scans: 4/ 4

$\tau_e$  : 1 ms

| Inrec-PSYCHE            |                       | CPMG-PSYCHE             |                          |                       |
|-------------------------|-----------------------|-------------------------|--------------------------|-----------------------|
| Delay $\tau$            | Experimental time     | Number of loops (m)     | Delay $\tau = 2\tau_e m$ | Experimental time     |
| 0.005 s                 | 24 min 7 s            | 4                       | 0.008 s                  | 24 min 8 s            |
| 0.1 s                   | 24 min 20 s           | 50                      | 0.1 s                    | 24 min 20 s           |
| 0.3 s                   | 24 min 46 s           | 100                     | 0.2 s                    | 24 min 33 s           |
| 0.4 s                   | 24 min 59 s           | 200                     | 0.4 s                    | 25 min 0 s            |
| 0.75 s                  | 25 min 46 s           | 400                     | 0.8 s                    | 25 min 53 s           |
| 2.0 s                   | 28 min 31 s           | 600                     | 1.2 s                    | 26 min 46 s           |
| 5.0 s                   | 35 min 7 s            | 1000                    | 2.0 s                    | 28 min 33 s           |
| Total experimental time | <b>3 h 7 min 36 s</b> | Total experimental time |                          | <b>3 h 1 min 13 s</b> |

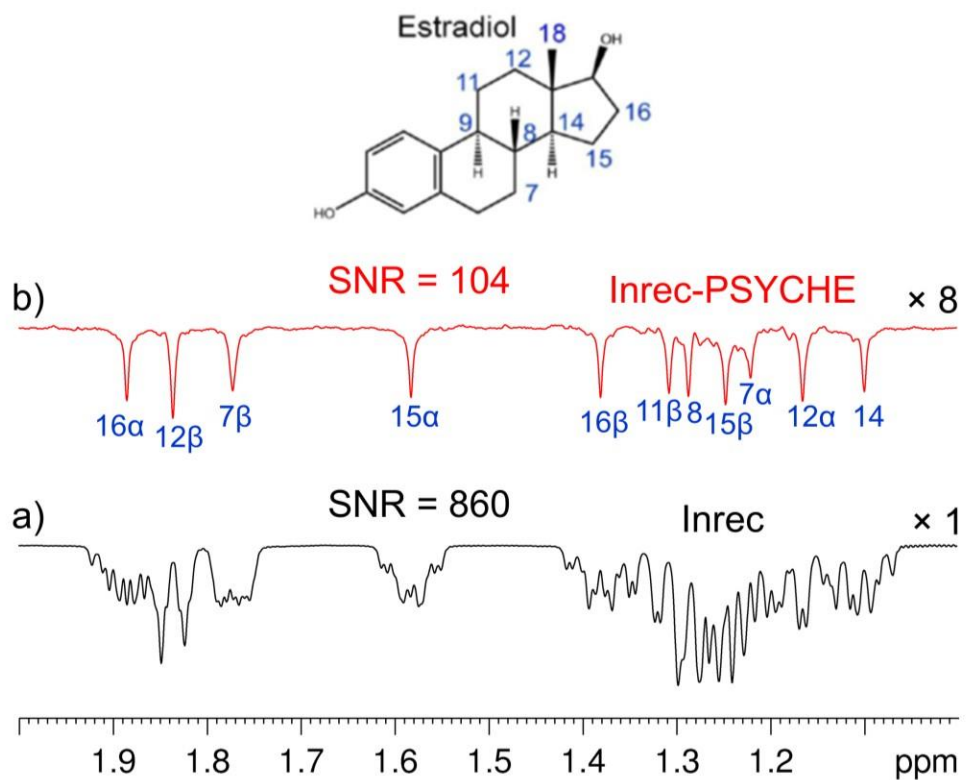

**Supporting Figure-1:** Comparison of the Inrec spectra recorded (at  $\tau = 0$  s) for estradiol molecule (10 mg dissolved in 0.5 ml of DMSO- $D_6$ ) in conventional (a) and PSYCHE-decoupling (b) schemes. Herein, SNR values are calculated for the well separated H15 $\alpha$  resonance of estradiol, which reveals that the measured SNR values of Inrec-PSYCHE is about ~12 % with respect to the conventional-Inrec. However, in reality, the SNR of Inrec-PSYCHE per unit measurement time would be only about ~2% when compared to the conventional-Inrec.

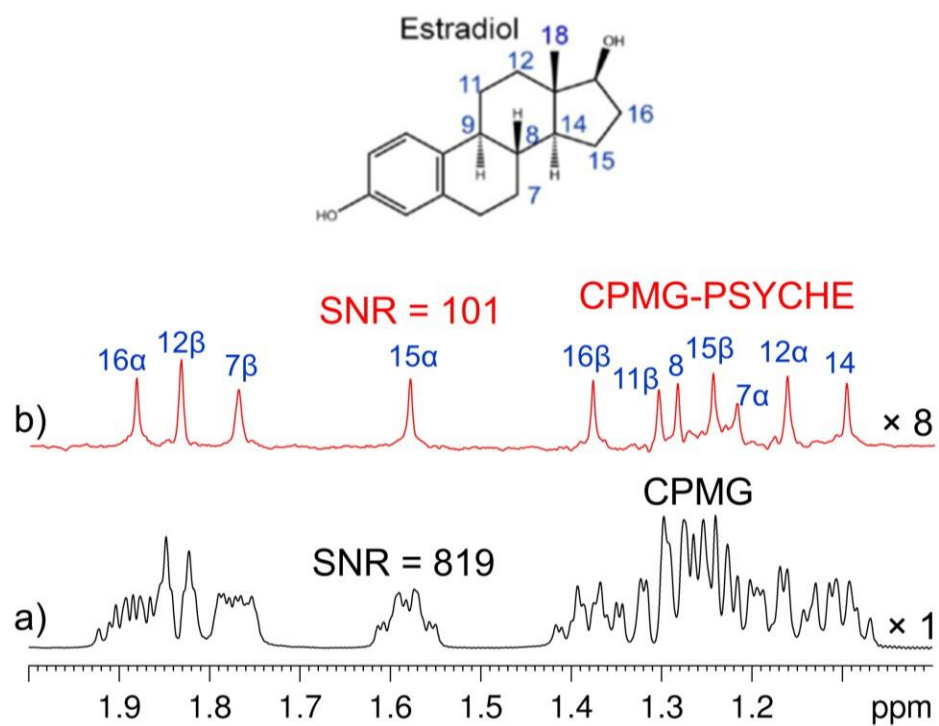

**Supporting Figure-2:** Comparison of the CPMG spectra recorded (at  $\tau = 0$  s) for estradiol molecule (10 mg dissolved in 0.5 ml of DMSO- $D_6$ ) in conventional (a) and PSYCHE-decoupling (b) schemes. Herein, SNR values are calculated for the well separated H15 $\alpha$  resonance of estradiol, which reveals that the measured SNR values of CPMG-PSYCHE is about ~12 % with respect to the conventional-CPMG. However, in reality, the SNR of CPMG-PSYCHE per unit measurement time would be only about 2% when compared to the conventional-CPMG.

## Pulse sequence of Inrec-PSYCHE

```
#include <Avance.incl>
#include <Grad.incl>
#include <Delay.incl>

define delay tauA
define delay tauB

"in0=inf1/2"
"p2=p1*2"
"p12=p11+d18"
"tauA=in0/2-p16-d16-50u"
"tauB=(dw*2*cnst4)+d16+50u"
"d12=10u"

"acqt0=-p1*2/3.1416"

1 ze
2 30m p11:f1
   d1
   p2 ph1
   d7
   p1 ph2
d0
tauA
50u UNBLKGRAD
p16:gp1
d16
p2 ph5
50u
p16:gp1
d16
tauA
p17:gp2
d17
10u p10:f1
tauB
( center (p12:gp12) (p11:sp11 ph4):f1 )
d16
p17:gp2
d17
d0
50u BLKGRAD
4 go=2 ph31
  30m mc #0 to 2 F1QF(id0)
exit

ph1=0 2
ph2=0 0 2 2 1 1 3 3
ph4=0
ph5=0
ph31=0 0 2 2 1 1 3 3
```

## Pulse sequence of CPMG-PSYCHE

```
#include <Avance.incl>
#include <Grad.incl>
#include <Delay.incl>

define delay tauA
define delay tauB

"in0=inf1/2"
"p2=p1*2"
"p12=p11+d18"
"tauA=in0/2-p16-d16-50u"
"tauB=(dw*2*cnst4)+d16+50u"
"d12=10u"

1 ze
2 30m p11:f1
   d1
   p1 ph1
3 d20
   p2 ph2
   d20
   lo to 3 times 14
d0
tauA
50u UNBLKGRAD
p16:gp1
d16
p2 ph3
50u
p16:gp1
d16
tauA
p17:gp2
d17
10u p10:f1
tauB
( center (p12:gp12) (p11:sp11 ph4):f1 )
d16
p17:gp2
d17
d0
50u BLKGRAD

4 go=2 ph31
  30m mc #0 to 2 F1QF(id0)
exit

ph1=0 0 2 2 1 1 3 3
ph2=1 3 1 3 0 2 0 2
ph3=0
ph4=0
ph31=0 0 2 2 1 1 3 3
```
